# Supplementary material for: Real-time analysis and visualization of nanopore metagenomic samples with MARTi
Source: Genome Res. 2025 Nov;35(11):2488–500. doi: 10.1101/gr.280550.125 (PMC12581910; doi:10.1101/gr.280550.125)
Supplement: Supplement 1 [file Supplemental_Table_S1.xlsx]

## Sheet: Supplemental_Table_S1
Supplemental Table S1. Mock community simulated read composition
Species	Read count	Read %
Akkermansia muciniphila	4000	4
Bacteroides fragilis	8000	8
Bifidobacterium adolescentis	16000	16
Candida albicans	1500	1.5
Clostridioides difficile	4000	4
Clostridium perfringens	500	0.5
Enterococcus faecalis	1000	1
Escherichia coli	2500	2.5
Faecalibacterium prausnitzii	14000	14
Fusobacterium nucleatum	6000	6
Lactobacillus fermentum	6000	6
Methanobrevibacter smithii	3000	3
Prevotella corporis	8000	8
Roseburia hominis	12000	12
Saccharomyces cerevisiae	1500	1.5
Salmonella enterica	2000	2
Veillonella rogosae	10000	10
Total	100000	100
