# Supplementary material for: Real-time analysis and visualization of nanopore metagenomic samples with MARTi
Source: Genome Res. 2025 Nov;35(11):2488–500. doi: 10.1101/gr.280550.125 (PMC12581910; doi:10.1101/gr.280550.125)
Supplement: Supplement 2 [file Supplemental_Table_S2.xlsx]

## Sheet: Supplemental_Table_S2
Supplemental Table S2. Read classification metrics of simulated mock community reads
	~3.6 kb read N50								~11 kb read N50
	Species				Genus				Species				Genus
Pipeline	Recall	Precision	F1	F0.5	Recall	Precision	F1	F0.5	Recall	Precision	F1	F0.5	Recall	Precision	F1	F0.5
MARTi-BLAST-nt-0.0	0.60264	0.972188	0.744055	0.865982	0.74769	0.980217	0.848308	0.922819	0.64831	0.967526	0.776387	0.880789	0.77266	0.966453	0.858759	0.920289
MARTi-BLAST-nt-0.1	0.60264	0.975083	0.744901	0.867817	0.74953	0.980444	0.849576	0.92354	0.64831	0.970698	0.777406	0.88289	0.77485	0.96751	0.860529	0.921677
MARTi-BLAST-nt-1.0	0.5913	1	0.743166	0.878551	0.76016	1	0.86374	0.940643	0.6445	0.981288	0.77801	0.888436	0.77728	0.983899	0.868469	0.934231
MARTi-BLAST-meta-0.0	0.65088	0.924139	0.763805	0.852553	0.82472	0.99705	0.902734	0.957054	0.68544	0.917112	0.78453	0.859042	0.83055	0.997346	0.906338	0.958834
MARTi-BLAST-meta-0.1	0.65088	0.929258	0.765548	0.856034	0.8286	0.997676	0.905312	0.958557	0.68544	0.923052	0.786696	0.863205	0.83536	0.997647	0.90932	0.960334
MARTi-BLAST-meta-1.0	0.63941	0.948651	0.763922	0.864984	0.83858	1	0.912204	0.962929	0.68177	0.940736	0.790586	0.874315	0.84459	1	0.915748	0.964505
MARTi-Centrifuge-meta-0.0	0.76711	0.87771	0.818692	0.85311	0.79248	0.989153	0.879961	0.942378	0.79428	0.875278	0.832814	0.857783	0.80356	0.990533	0.887304	0.946487
MARTi-Centrifuge-meta-0.1	0.76711	0.883035	0.821	0.857129	0.79775	0.991856	0.884276	0.945829	0.79428	0.880576	0.835205	0.861849	0.80902	0.991981	0.891207	0.949055
MARTi-Centrifuge-meta-1.0	0.76216	0.907247	0.828399	0.873973	0.81648	0.999743	0.898866	0.956792	0.78932	0.900095	0.841076	0.87552	0.82417	0.999757	0.903512	0.958899
EPI2ME-Centrifuge-meta-0.0	0.71243	0.808028	0.757224	0.786909	0.7222	0.965482	0.826306	0.904541	0.72005	0.788465	0.752706	0.773761	0.7243	0.958881	0.825244	0.900548
MARTi-Kraken2-pluspf8-0.0	0.72782	0.913784	0.810269	0.869359	0.80803	0.972125	0.882514	0.934182	0.80469	0.917957	0.8576	0.892822	0.82499	0.967889	0.890745	0.935482
MARTi-Kraken2-pluspf8-0.1	0.72782	0.923419	0.814034	0.876317	0.81634	0.979071	0.890331	0.941534	0.80469	0.925325	0.860801	0.898388	0.83197	0.971009	0.896128	0.939603
MARTi-Kraken2-pluspf8-1.0	0.72288	0.946426	0.819685	0.8913	0.83082	0.983766	0.900847	0.948832	0.79973	0.947873	0.867523	0.914011	0.84797	0.976598	0.90775	0.947842
EPI2ME-Kraken2-pluspf8-0.0	0.72782	0.913784	0.810269	0.869359	0.80803	0.972125	0.882514	0.934182	0.80469	0.917957	0.8576	0.892822	0.82499	0.967889	0.890745	0.935482
MARTi-BLAST-pluspf8-0.0	0.63135	0.968952	0.764541	0.875338	0.84972	0.981212	0.910744	0.951756	0.67773	0.96474	0.796159	0.889409	0.85002	0.976743	0.908986	0.948463
MARTi-BLAST-pluspf8-0.1	0.63135	0.970278	0.764953	0.876203	0.85061	0.982274	0.911713	0.952778	0.67773	0.966984	0.796922	0.890934	0.85165	0.977021	0.910038	0.949079
MARTi-BLAST-pluspf8-1.0	0.62805	1	0.771537	0.894098	0.86499	0.984902	0.921059	0.958331	0.67383	0.979219	0.798315	0.897837	0.85553	0.980989	0.913974	0.953037
