# Supplementary material for: Real-time analysis and visualization of nanopore metagenomic samples with MARTi
Source: Genome Res. 2025 Nov;35(11):2488–500. doi: 10.1101/gr.280550.125 (PMC12581910; doi:10.1101/gr.280550.125)
Supplement: Supplement 3 [file Supplemental_Table_S3.xlsx]

## Sheet: Supplemental_Table_S3
Supplemental Table S3. Taxa detection metrics for different pipelines using simulated mock community reads
	Species							Genus
Pipeline	True positives	False positives	False negatives	Recall	Precision	F1	F0.5	True positives	False positives	False negatives	Recall	Precision	F1	F0.5
MARTi-BLAST-nt-0.0	17	25	0	1	0.4	0.58	0.46	17	17	0	1	0.5	0.666667	0.555556
MARTi-BLAST-nt-0.1	17	7	0	1	0.71	0.83	0.75	17	3	0	1	0.85	0.918919	0.876289
MARTi-BLAST-nt-1.0	15	0	2	0.88	1	0.94	0.97	16	0	1	0.94	1	0.969697	0.987654
MARTi-BLAST-meta-0.0	16	48	1	0.94	0.25	0.4	0.29	17	25	0	1	0.4	0.576271	0.45946
MARTi-BLAST-meta-0.1	16	16	1	0.94	0.5	0.65	0.55	17	1	0	1	0.94	0.971429	0.955056
MARTi-BLAST-meta-1.0	14	2	3	0.82	0.88	0.85	0.86	16	0	1	0.94	1	0.969697	0.987654
MARTi-Centrifuge-meta-0.0	16	77	1	0.94	0.17	0.29	0.21	17	127	0	1	0.12	0.21118	0.143339
MARTi-Centrifuge-meta-0.1	16	18	1	0.94	0.47	0.63	0.52	17	4	0	1	0.81	0.894737	0.841584
MARTi-Centrifuge-meta-1.0	15	5	2	0.88	0.75	0.81	0.77	16	0	1	0.94	1	0.969697	0.987654
EPI2ME-Centrifuge-meta-0.0	14	55	3	0.82	0.2	0.33	0.24	17	280	0	1	0.06	0.10828	0.0705394
MARTi-Kraken2-pluspf8-0.0	17	118	0	1	0.13	0.22	0.15	17	103	0	1	0.14	0.248175	0.171026
MARTi-Kraken2-pluspf8-0.1	17	15	0	1	0.53	0.69	0.59	17	4	0	1	0.81	0.894737	0.841584
MARTi-Kraken2-pluspf8-1.0	16	3	1	0.94	0.84	0.89	0.86	16	1	1	0.94	0.94	0.941176	0.941176
EPI2ME-Kraken2-pluspf8-0.0	17	118	0	1	0.13	0.22	0.15	17	103	0	1	0.14	0.248175	0.171026
MARTi-BLAST-pluspf8-0.0	17	27	0	1	0.39	0.56	0.44	17	20	0	1	0.46	0.62963	0.515151
MARTi-BLAST-pluspf8-0.1	17	9	0	1	0.65	0.79	0.7	17	2	0	1	0.89	0.944444	0.913979
MARTi-BLAST-pluspf8-1.0	16	0	1	0.94	1	0.97	0.99	16	1	1	0.94	0.94	0.941176	0.941176
