# Supplementary material for: Real-time analysis and visualization of nanopore metagenomic samples with MARTi
Source: Genome Res. 2025 Nov;35(11):2488–500. doi: 10.1101/gr.280550.125 (PMC12581910; doi:10.1101/gr.280550.125)
Supplement: Supplement 4 [file Supplemental_Table_S4.xlsx]

## Sheet: Supplemental_Table_S4
Supplemental Table S4. Relative taxonomic abundance Bray-Curtis dissimilarity scores for different pipelines using a simulated mock community
Pipeline	Species-level	Genus-level
MARTi-BLAST-nt-0.0	0.2244	0.135
MARTi-BLAST-nt-0.1	0.2238	0.1349
MARTi-BLAST-nt-1.0	0.2329	0.1355
MARTi-BLAST-meta-0.0	0.2034	0.0561
MARTi-BLAST-meta-0.1	0.2017	0.056
MARTi-BLAST-meta-1.0	0.2092	0.0595
MARTi-Centrifuge-meta-0.0	0.1715	0.0482
MARTi-Centrifuge-meta-0.1	0.1694	0.0477
MARTi-Centrifuge-meta-1.0	0.1625	0.05
EPI2ME-Centrifuge-meta-0.0	0.2557	0.0776
MARTi-Kraken2-pluspf8-0.0	0.1518	0.0655
MARTi-Kraken2-pluspf8-0.1	0.1464	0.0641
MARTi-Kraken2-pluspf8-1.0	0.1396	0.0673
EPI2ME-Kraken2-pluspf8-0.0	0.1518	0.0655
MARTi-BLAST-pluspf8-0.0	0.2056	0.0692
MARTi-BLAST-pluspf8-0.1	0.2053	0.069
MARTi-BLAST-pluspf8-1.0	0.2018	0.0728
