# Supplementary material for: Real-time analysis and visualization of nanopore metagenomic samples with MARTi
Source: Genome Res. 2025 Nov;35(11):2488–500. doi: 10.1101/gr.280550.125 (PMC12581910; doi:10.1101/gr.280550.125)
Supplement: Supplement 5 [file Supplemental_Table_S5.xlsx]

## Sheet: Supplemental_Table_S5
Supplemental Table S5. Databases used for benchmarking MARTi
Database	Content	No. Taxon IDs	Disk size (GB)
PlusPF-8 (03-2023)	Refeq archaea, bacteria, viral, plasmid, human, protozoa, fungi, UniVec_Core	26159	47 (BLAST)
			9.4 (Kraken2)
Metagenomic (11-2023)	Refseq archaea, bacteria, viral, fungi, human	26309	46 (BLAST)
			81 (Kraken2)
			105 (Centrifuge)
NCBI Nucleotide (03-2023)	NCBI nucleotide non-redundant sequences	2063114	291 (BLAST)
NCBI Nucleotide (03-2024)	NCBI nucleotide non-redundant sequences	2109539	483 (BLAST)
NCBI Core Nucleotide (10-2024)	NCBI core nucleotide non-redundant sequences	2144437	273 (BLAST)
Refseq Prok (04-2018)	Refseq archaea, bacteria	3333	9.5 (Centrifuge)
