# Supplementary material for: Real-time analysis and visualization of nanopore metagenomic samples with MARTi
Source: Genome Res. 2025 Nov;35(11):2488–500. doi: 10.1101/gr.280550.125 (PMC12581910; doi:10.1101/gr.280550.125)
Supplement: Supplement 6 [file Supplemental_Table_S6.xlsx]

## Sheet: Supplemental_Table_S6
Supplemental Table S6. Comparison of species-level relative abundances in the Even mock community as reported by Loman et al. (2019) and as classified by MARTi
Species	Expected (%)	Loman et al. 2019 (%)	MARTi (% at Species level)	MARTi (% of Analysed)
Bacillus spizizenii	12	19.32	18.1047	15.3694
Listeria monocytogenes	12	14.56	8.82662	7.49306
Enterococcus faecalis	12	12.24	13.5836	11.5313
Staphylococcus aureus	12	11.28	13.1697	11.18
Salmonella enterica	12	9.99	11.4607	9.72914
Escherichia coli	12	9.93	7.9827	6.77664
Pseudomonas aeruginosa	12	9.7	10.3748	8.80732
Limosilactobacillus fermentum	12	9.28	12.1881	10.3467
Saccharomyces cerevisiae	2	1.92	1.99668	1.69501
Cryptococcus neoformans	2	1.78	2.3125	1.96312
Unclassified	0	0	0	0.0146161
Higher taxa	0	0	0	15.0938
